# Supplementary material for: The Role of SBI2/ALG12/EBS4 in the Regulation of Endoplasmic Reticulum-Associated Degradation (ERAD) Studied by a Null Allele
Source: MDPI journal article supplement (doi:10.3390/ijms23105811), 2022-05-22
Supplement: s1 [file s1]

# The Role of SBI2/ALG12/EBS4 in the Regulation of Endoplasmic Reticulum-Associated Degradation (ERAD) Studied by a Null Allele

Xiaoxia Sun, Di Zhao, Khawar Ali, Yumeng Zhu, Guang Wu \* and Guishuang Li \*

|                                | Ws-2              | <i>bri1-5</i>             | <i>sbi2<br/>bri1-5</i>   | <i>sbi2</i>       | Col-0             | <i>bri1-9</i>             | <i>sbi2<br/>bri1-9</i>  | <i>bri1-235</i>           | <i>sbi2<br/>bri1-235</i> |
|--------------------------------|-------------------|---------------------------|--------------------------|-------------------|-------------------|---------------------------|-------------------------|---------------------------|--------------------------|
| Lobe<br>( $\mu\text{m}$ )      | 18.29 $\pm$ 0.387 | 11.24 $\pm$ 0.236<br>**** | 14.19 $\pm$ 0.224<br>*** | 17.68 $\pm$ 0.335 | 19.55 $\pm$ 0.297 | 13.29 $\pm$ 0.269<br>**** | 14.08 $\pm$ 0.339       | 14.4 $\pm$ 0.322<br>****  | 14.46 $\pm$ 0.279        |
| Neck<br>( $\mu\text{m}$ )      | 17.08 $\pm$ 0.296 | 20.1 $\pm$ 0.34<br>****   | 19.25 $\pm$ 0.283        | 18.62 $\pm$ 0.312 | 15 $\pm$ 0.146    | 17.15 $\pm$ 0.424<br>**** | 18.11 $\pm$ 0.288       | 19.22 $\pm$ 0.323<br>**** | 18.11 $\pm$ 0.388        |
| Perimeter<br>( $\mu\text{m}$ ) | 578.8 $\pm$ 15.78 | 381.3 $\pm$ 12.87<br>**** | 455.6 $\pm$ 14.31<br>*   | 619.8 $\pm$ 16.6  | 492.9 $\pm$ 12.38 | 308.9 $\pm$ 13.7<br>****  | 358.8 $\pm$ 14.29       | 407.1 $\pm$ 12.58<br>***  | 453.2 $\pm$ 13.27        |
| Area<br>( $\mu\text{m}^2$ )    | 5181 $\pm$ 153.4  | 4101 $\pm$ 171.6<br>****  | 4761 $\pm$ 203.7         | 5271 $\pm$ 76.45  | 4687 $\pm$ 116.3  | 2621 $\pm$ 142.7<br>****  | 3558 $\pm$ 152.7<br>*** | 3930 $\pm$ 153.4<br>**    | 4035 $\pm$ 129.6         |
| Circularity                    | 0.199 $\pm$ 0.007 | 0.361 $\pm$ 0.011<br>**** | 0.292 $\pm$ 0.009<br>*** | 0.179 $\pm$ 0.008 | 0.251 $\pm$ 0.006 | 0.356 $\pm$ 0.012<br>**** | 0.362 $\pm$ 0.015       | 0.302 $\pm$ 0.007<br>**   | 0.256 $\pm$ 0.012        |

**Figure S1.** The size of cotyledon pavement cells. The measurements of cotyledon pavement cells were performed using ImageJ software.  $N \geq 30$  seedlings for measurements. \*  $p < 0.05$ , \*\*  $p < 0.01$ , \*\*\*  $p < 0.001$ , \*\*\*\*  $p < 0.0001$  as Tukey's multiple comparisons test.

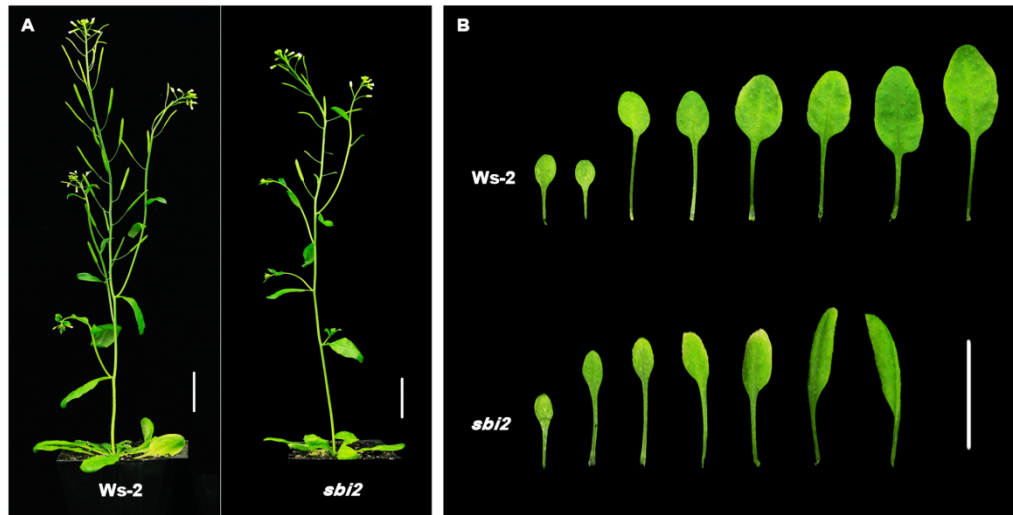

**Figure S2.** Phenotypes of *Arabidopsis* wild type Ws-2 and mutant *sbi2*. **(A)** The comparison of 2-month-old mature plants of Ws-2 and *sbi2*. Scale bar = 3 cm. **(B)** Fewer leaves were exhibited in *sbi2* than Ws-2. Scale bar = 2 cm.

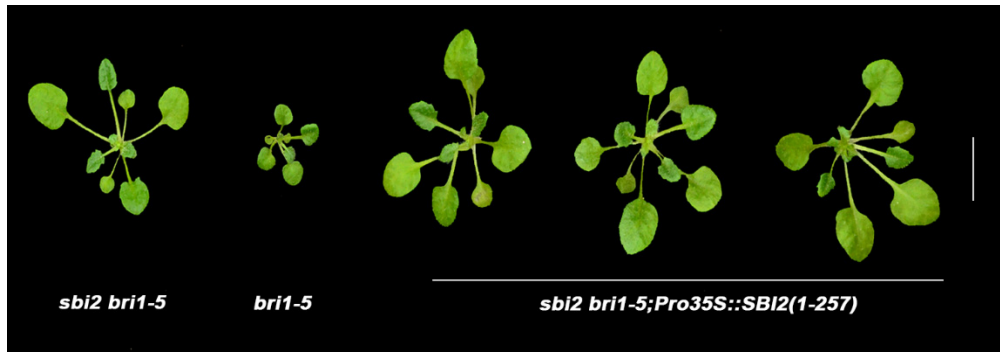

**Figure S3.** Three weeks soil-grown plants of *sbi2 bri1-5*, *bri1-5*, three transgenic lines carrying a *SBI2(1-257)* transgene driven by the 35S promoter. Scale bar = 1 cm.

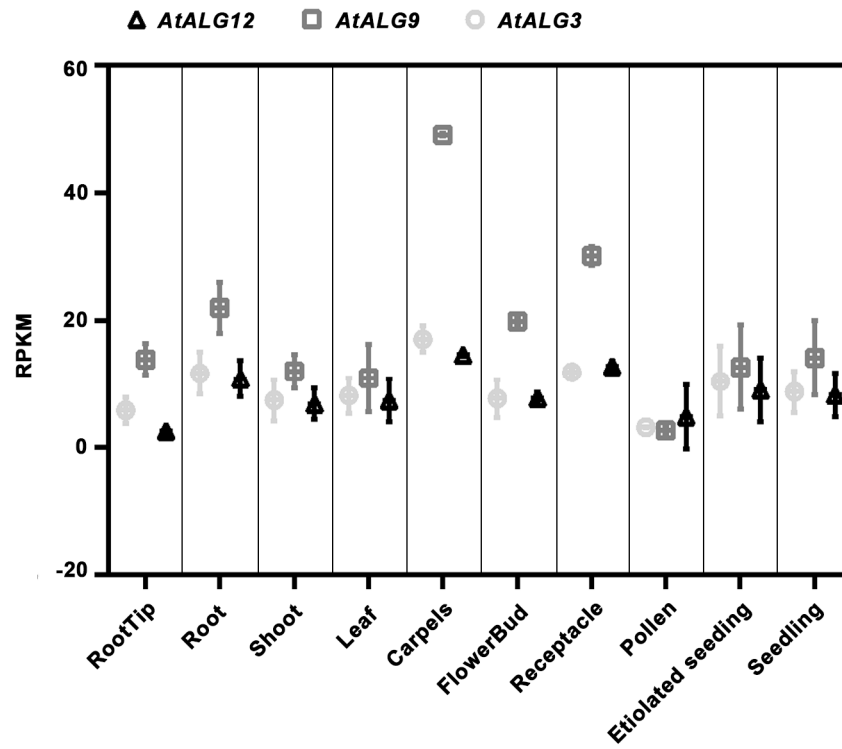

**Figure S4.** Expression levels of *AtALG12*, *AtALG3* and *AtALG9* were plotted as graph in different tissues ([https://bar.utoronto.ca/eFP-Seq\\_Browser/](https://bar.utoronto.ca/eFP-Seq_Browser/)).

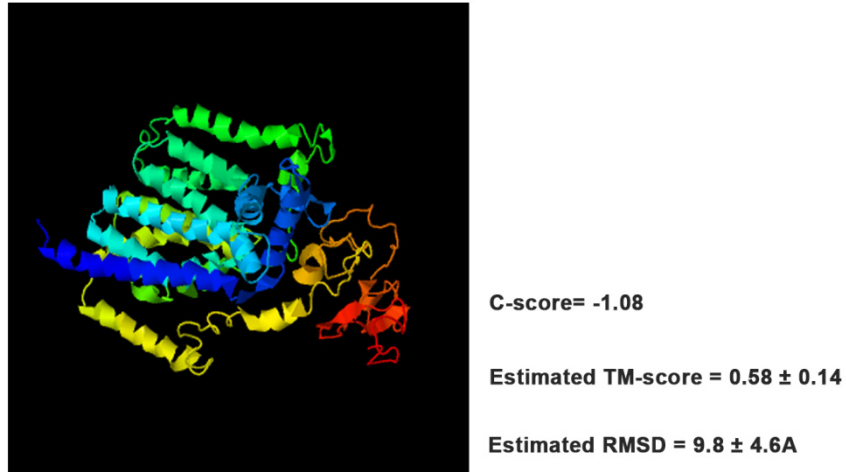

**Figure S5.** The structure model of SBI2/EBS4 was predicted by I-TASSER. score is in -5, 2 and C-score > -1.5 indicates a model of correct global topology.  
(<https://zhanglab.ccmb.med.umich.edu/I-TASSER/>).

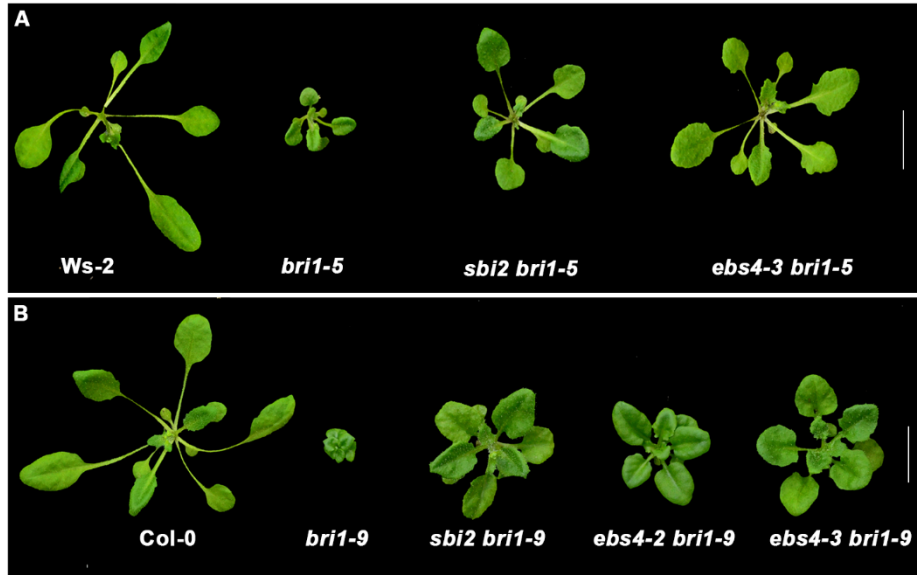

**Figure S6.** 3-week-old seedlings grown in the soil under a long-day condition (16/8 h, light/dark). (A) Phenotypes of three-week-old soil-grown seedlings of *Ws-2*, *bri1-5*, *sbi2 bri1-5*, and *ebs4-3 bri1-5*. Scale bar, 1 cm. (B) Phenotypes of three-week-old seedlings of *Col-0*, *bri1-9*, *sbi2 bri1-9*, *ebs4-2 bri1-9* and *ebs4-3 bri1-9*. Scale bar, 1 cm.

**Table S1.** Primers used in this study.

| Name                  | Sequence (5'-3')                  |
|-----------------------|-----------------------------------|
| Actin2-RT-F           | ACTCTCCCGCTATGTATGTCG             |
| Actin2-RT-R           | TGGACCTGCCTCATCATACTC             |
| BRI1-RT-F             | GGTAGAGAGATGAGGAAGAGA             |
| BRI1-RT-R             | CTCATAATTTTCCTTCAGGAAC TTC        |
| CPD-RT-F              | GTTCTTATCCTGCTTCCATTTG            |
| CPD-RT-R              | AGCCACTCGTAGCGTCTCATT             |
| DWF4-RT-F             | CGAAGGAAGGCTCTTTGAATG             |
| DWF4-RT-R             | CTTCAACGGCTTTAGGGCAA              |
| BAS1-RT-F             | G TTCAGGACATTGTGGAGGAG            |
| BAS1-RT-R             | GGATAAAGCAACATAAGGACG             |
| SBI2/EBS4Sac1-F       | CGAGCTCATGCCGACGGATTCGAAAATG      |
| SBI2/EBS4BamH1-R      | CGGATCCACATCCAGGCCATTTCTTAT       |
| BiP3-RT-F             | TTCGAAGTGGACGCAAATGG              |
| BiP3-RT-R             | CTATAGCTAACCGACTCAAAGACCT         |
| PDI5-RT-F             | CTCGTGAAGCTGAGGGTATTG             |
| PDI5-RT-R             | TGTGCGAAATCTAACTCAGAG             |
| ACT2-RT-F             | GGTAACATTGTGCTCAGTGGTGG           |
| ACT2-RT-R             | AACGACCTTAATCTTCATGCTGC           |
| bri1-5-genotyping-F   | AGAATCAAGAGATAGGTGGTTGGG          |
| bri1-5-genotyping-R   | GCTGGTTAAAGAAGCAGAGCA             |
| bri1-9-genotyping-F   | TAACAATGGTTCGATGATGTTTCTGGACAAGC  |
| bri1-9-genotyping-R   | GCATAGTAAGAGCTGACATAGCCTG         |
| bri1-235-genotyping-F | TCTCAACGTCGGATTCAGTGC             |
| bri1-235-genotyping-R | AAGATGTTGCAGAGCAGAGC              |
| bri1-301-genotyping-F | CATCGAAATCTTGTGCCTCTTCTTG         |
| bri1-301-genotyping-R | CTCGGGGTCAAACACATCGCTAATC         |
| bri1-119-genotyping-F | ACCCTTGTAATATCACTAGCAGAGTCTATGAAG |
| bri1-119-genotyping-R | CGATTTCCGTAAGCATAGTAAGAGC         |
| bri1-116-genotyping-F | TGGCGAGTTACCGATGGATACG            |
| bri1-116-genotyping-R | CTCTTAGATCACCTACCTCATCAGG         |
| det2-1-genotyping-F   | AGGATGACTACGAAGACGGAAAC           |
| det2-1-genotyping-R   | CAGCCCAGCCCAACCACTCAATAAGCT       |
| LBb1.3                | ATTTTGCCGATTTTCGGAAC              |
| cpd-22-LP             | TTTCTTTCTCTCCGCTCCTTC             |
| cpd-22-RP             | CTACTCCGCCGTACACGTTAC             |
